# Supplementary material for: Targeting the LY6H-PI3K/AKT Autophagy Axis Suppresses HCC Malignancy and Reveals a Druggable Vulnerability
Source: Research Square preprint supplement (doi:10.21203/rs.3.rs-7392770/v1), 2025-09-25

**Original western blots for**

**Targeting the LY6H-PI3K/AKT Autophagy Axis Suppresses HCC Malignancy and Reveals a Druggable Vulnerability**

**Figure 1. E**


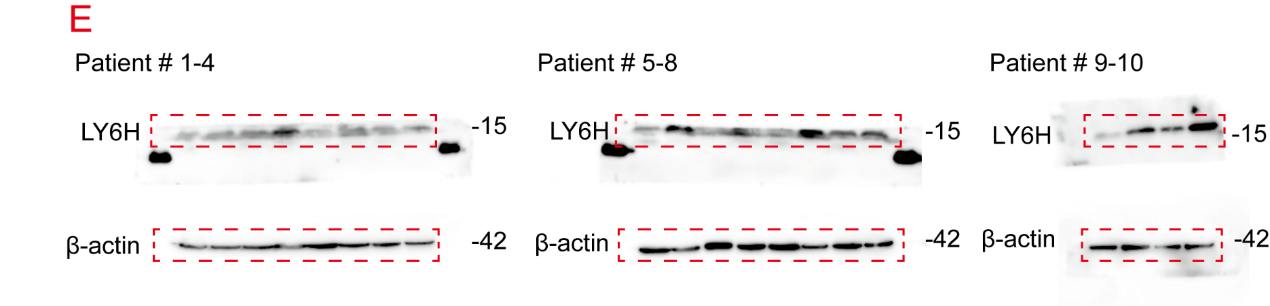


**Figure 2. D. E**


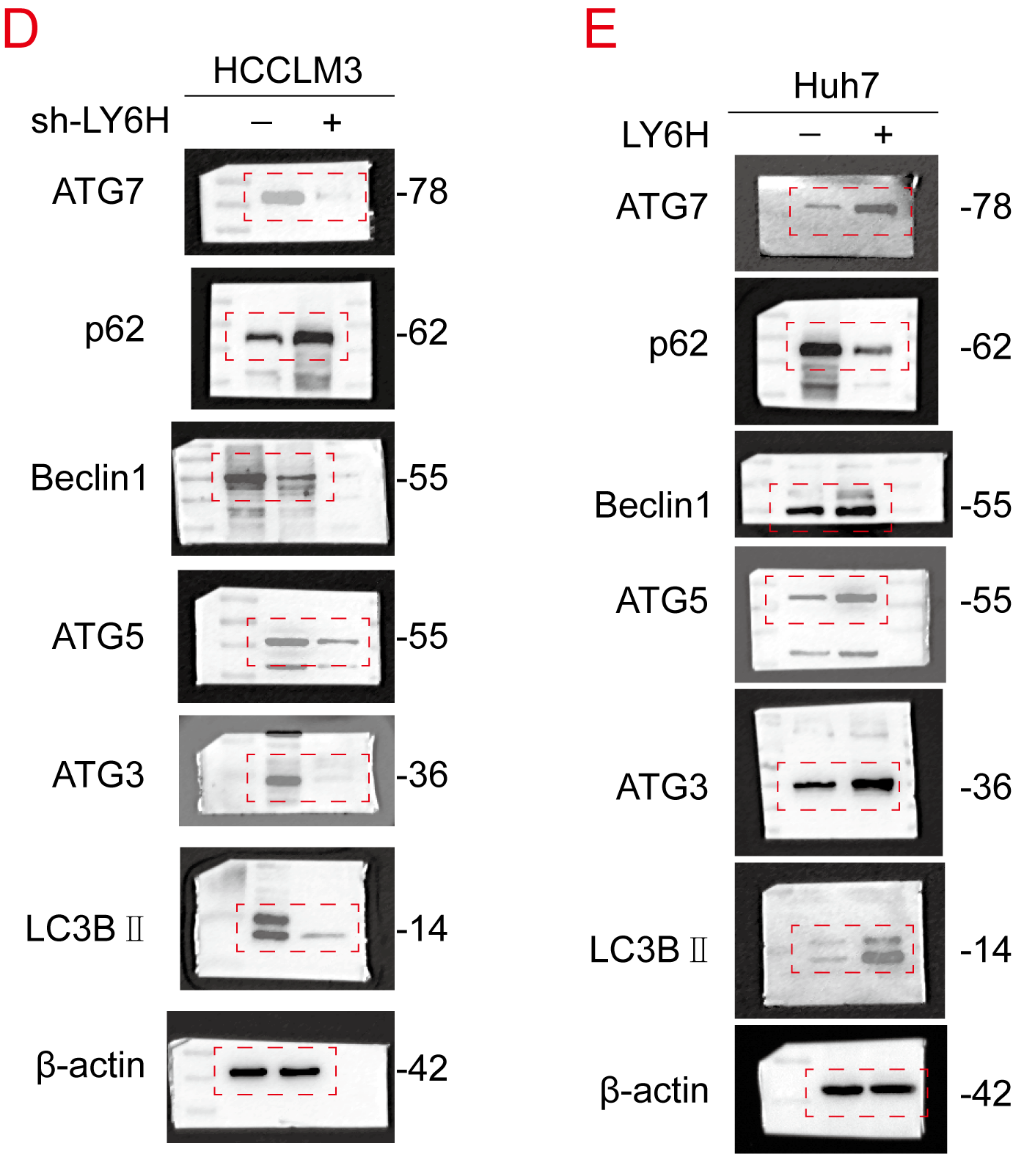


**Figure 3. C. D. G. H**


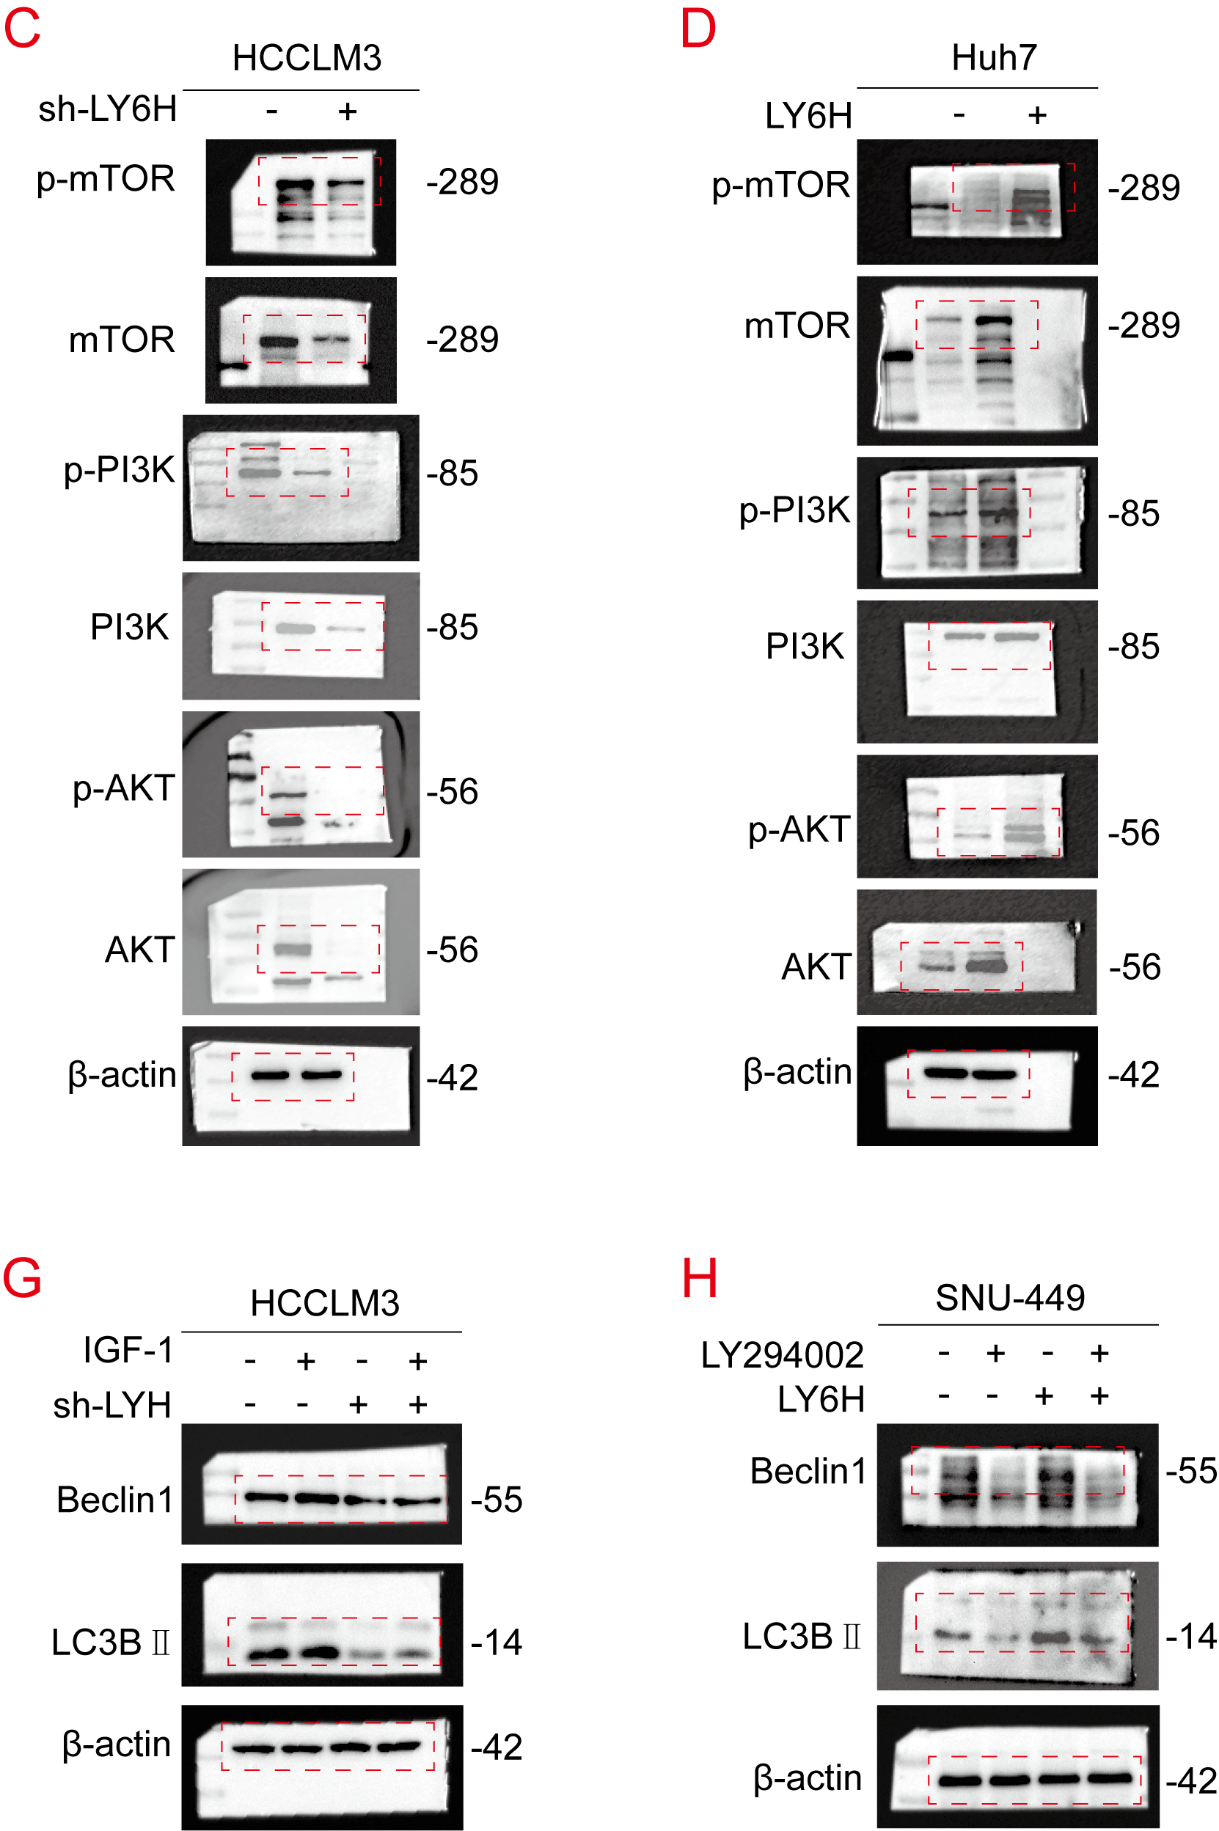


**Figure 4. A. F**


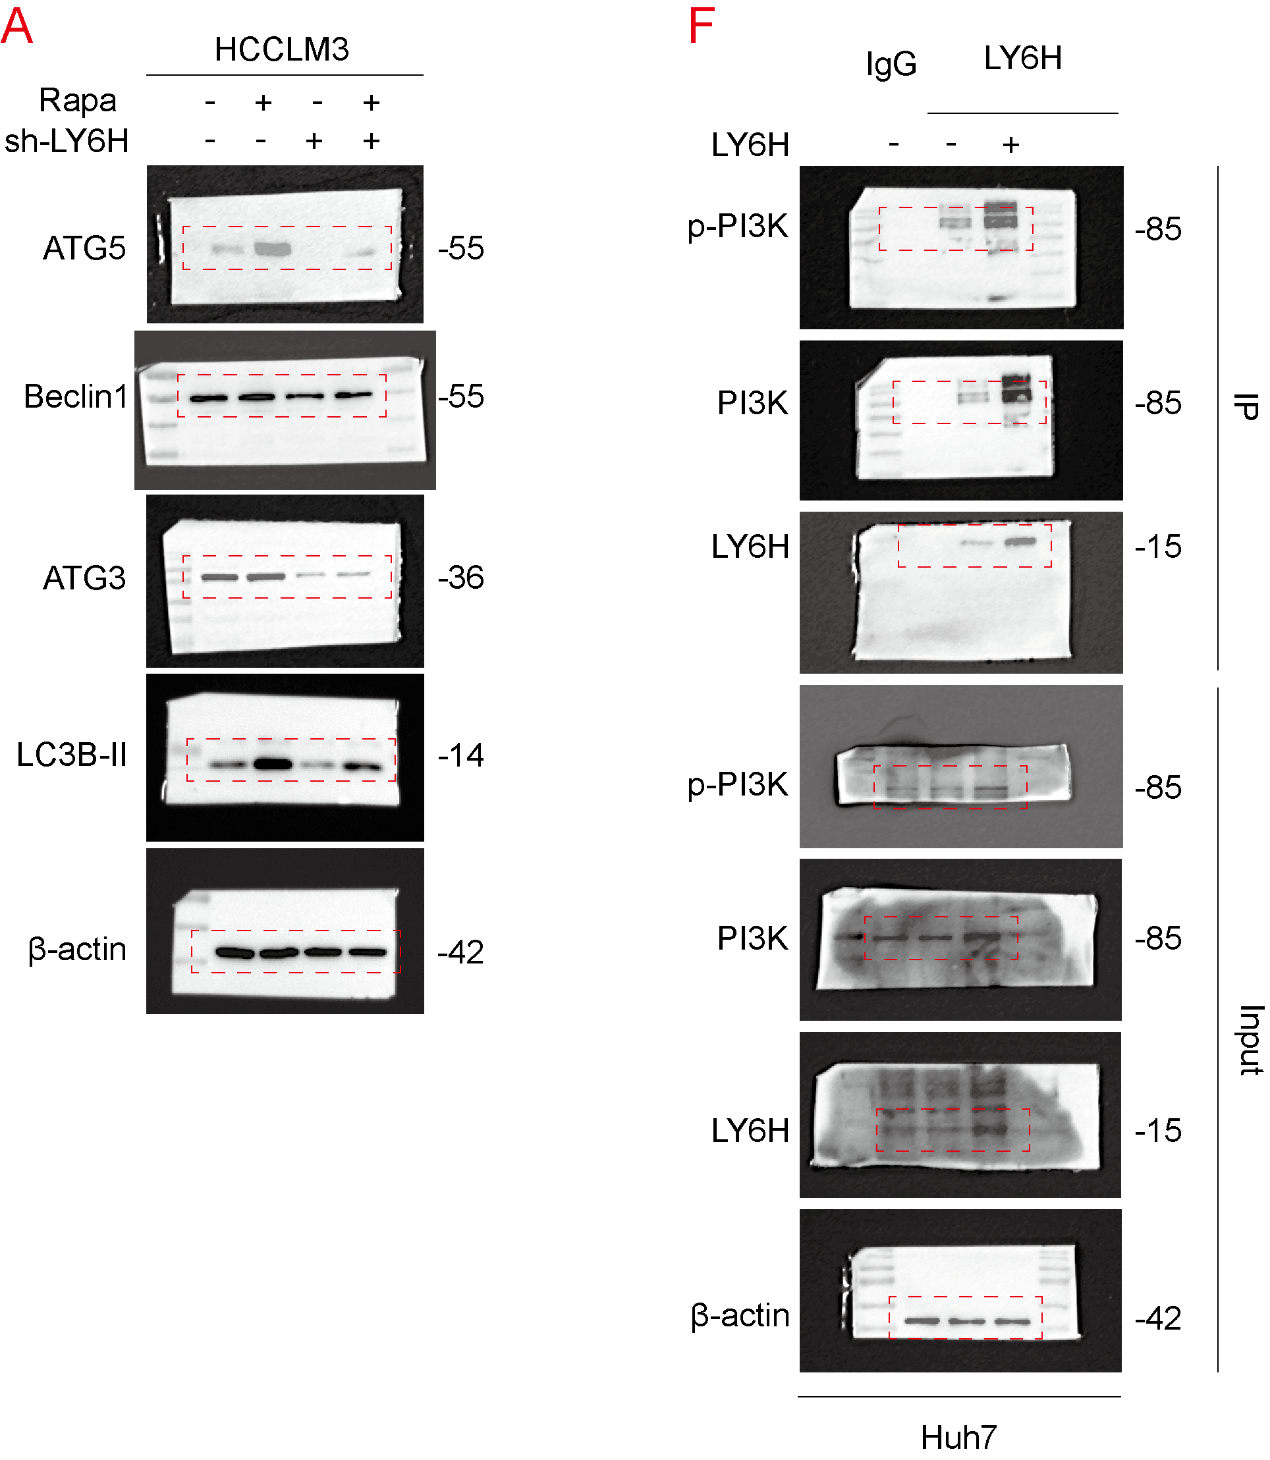


**Figure 6. G. H**


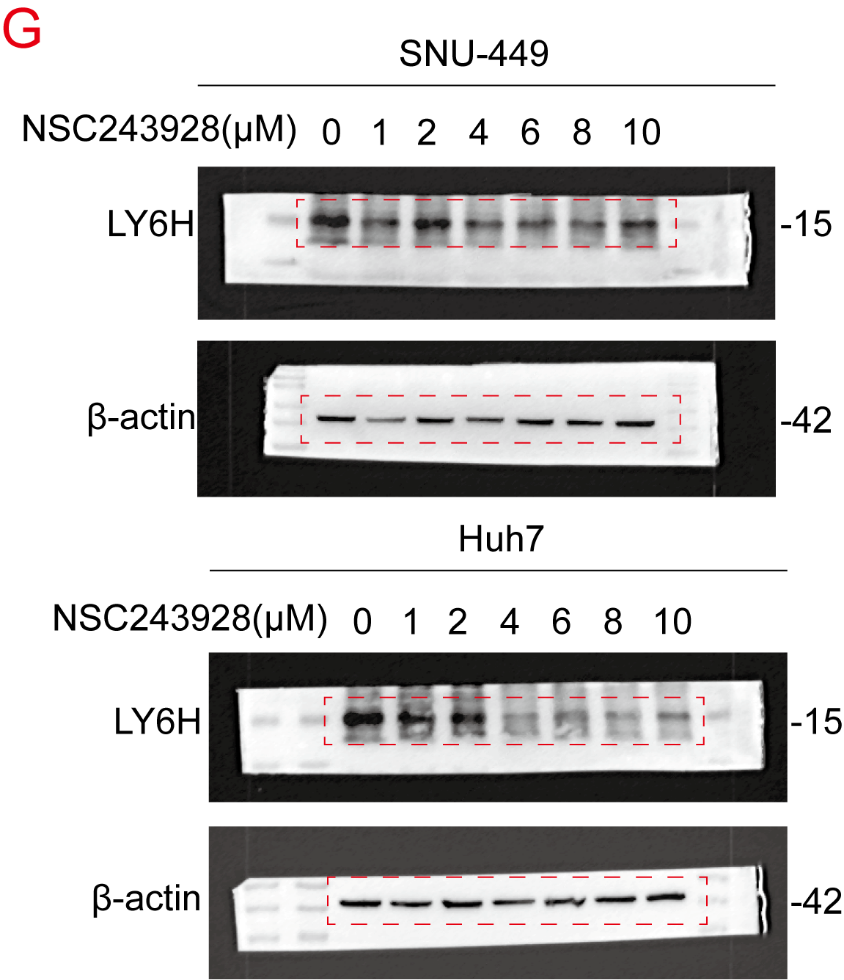


**Figure S. 1. B. D. F**


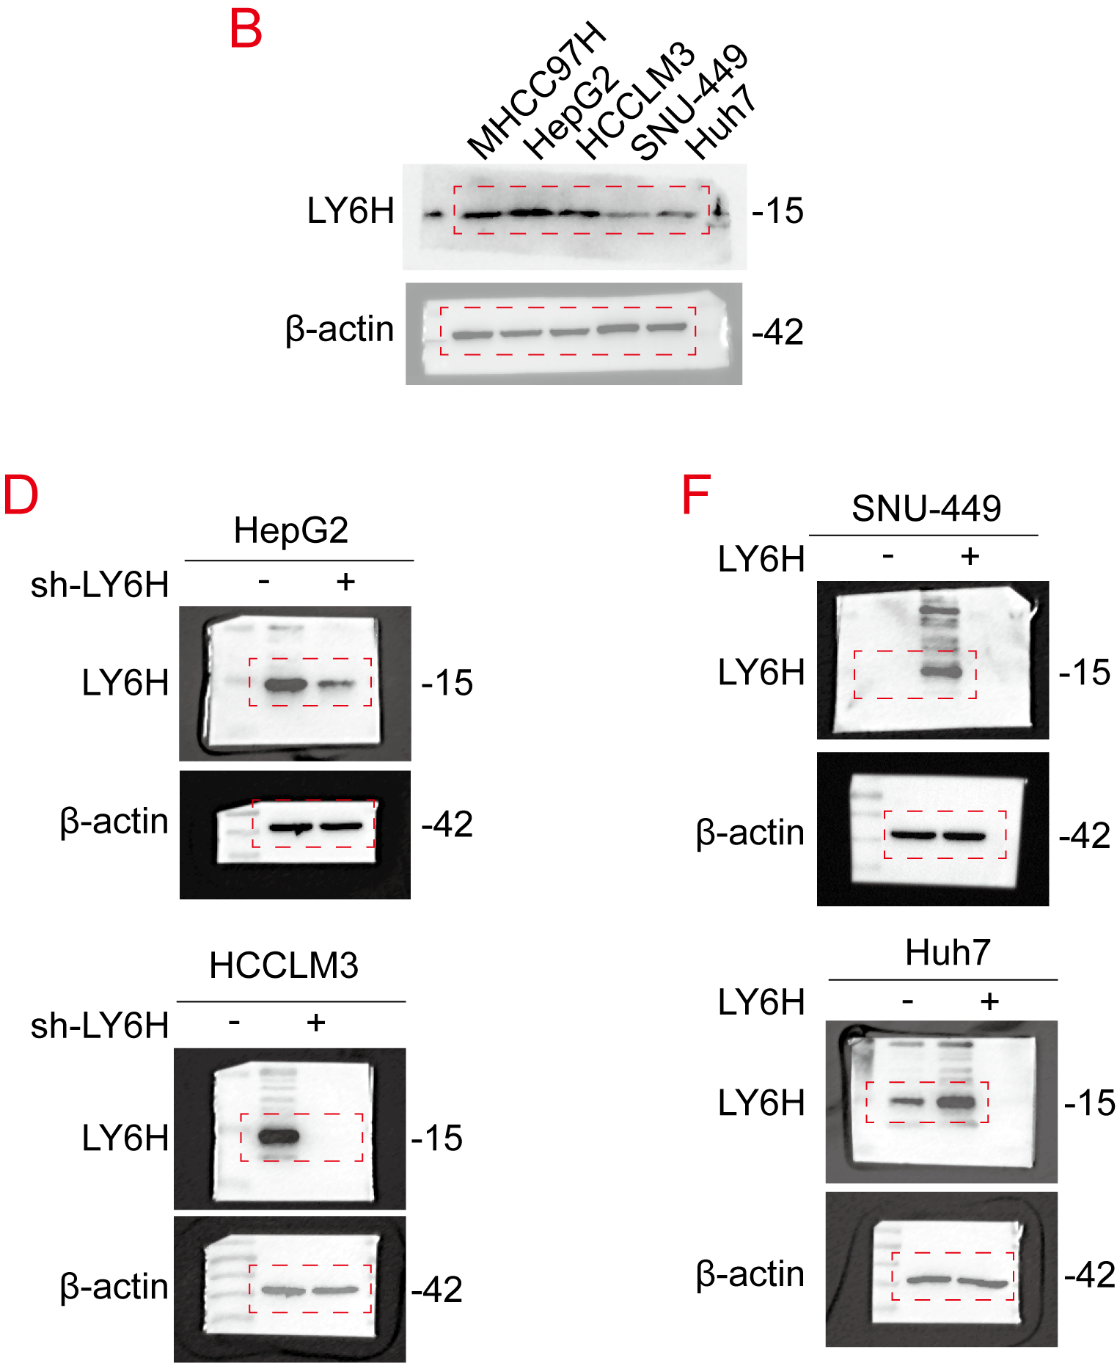


**Figure S3. C. D**


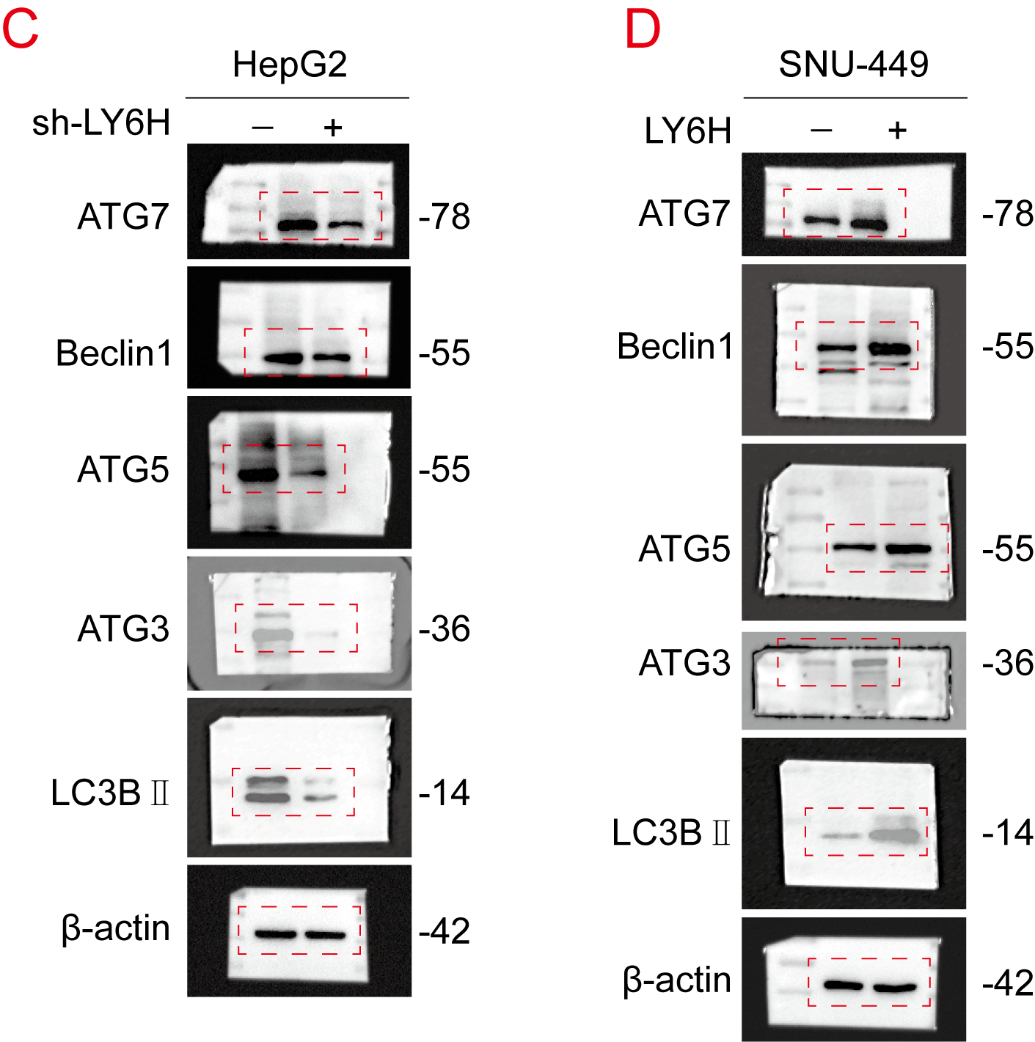


**Figure S5. C. D**


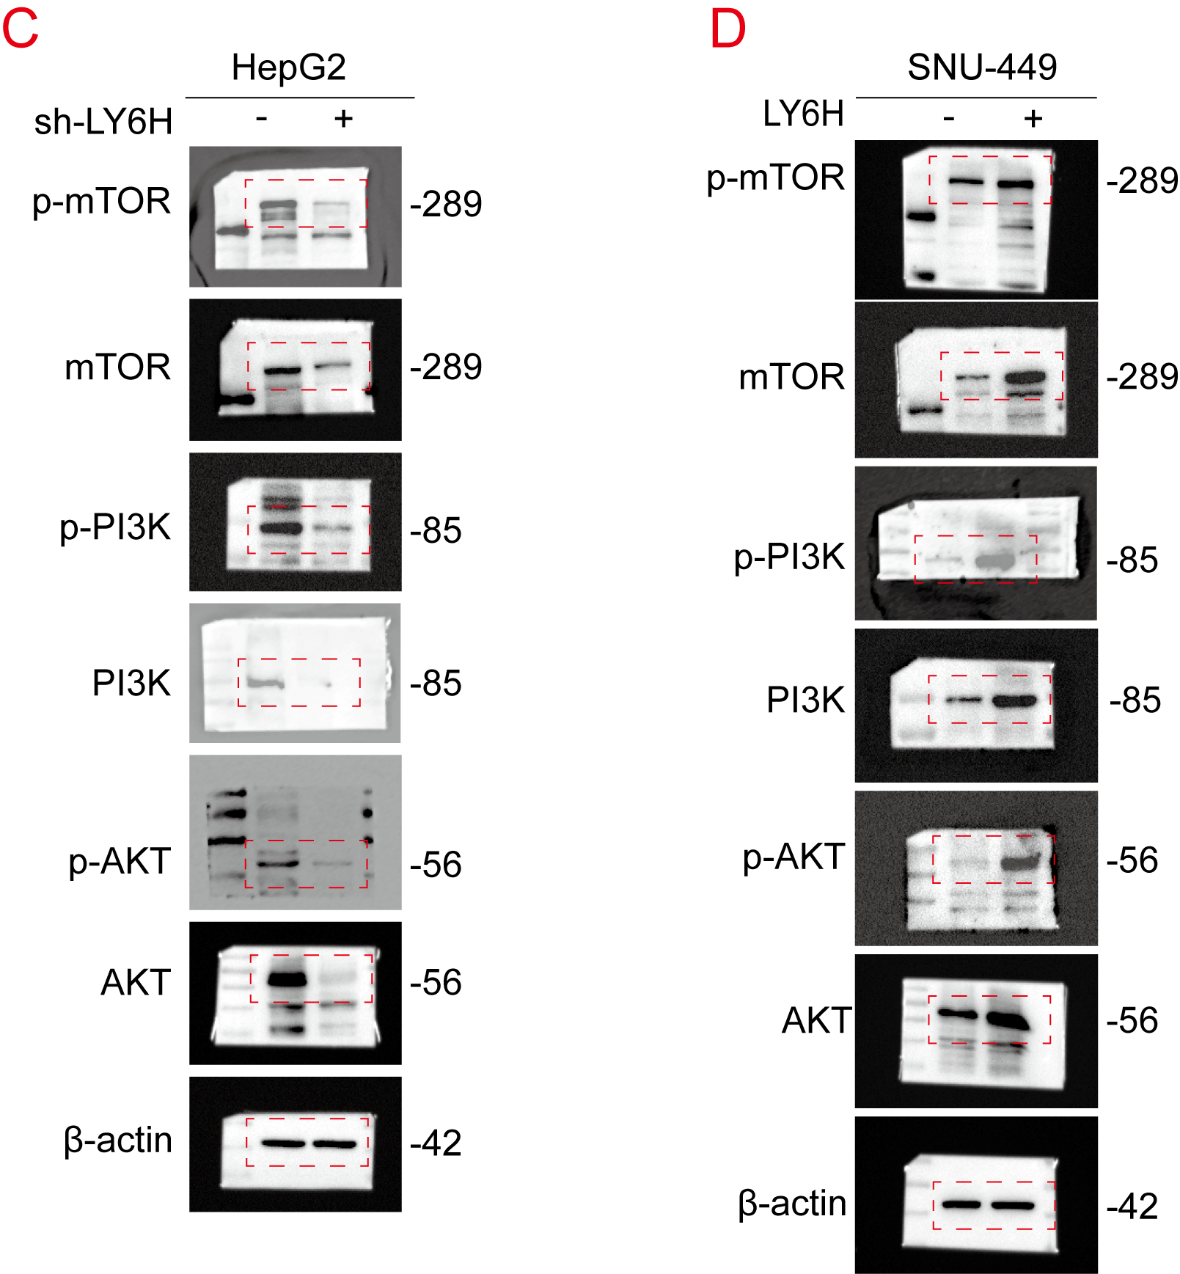

Supplement: Supplementary file 2 [file fea49b30313a9a6097e887bc.docx]
